# Supplementary material for: Selective production of para-xylene and light olefins from methanol over the mesostructured Zn–Mg–P/ZSM-5 catalyst
Source: Royal Society of Chemistry journal article supplement (doi:10.1039/c8cy02189a), 2018-12-04
Supplement: c8cy02189a1.pdf [file c8cy02189a1.pdf]

## Electronic Supplementary Information

### Selective production of *para*-xylene and light olefins from methanol over mesostructured Zn-Mg-P/ZSM-5 catalyst

*By*

Jiaoyu Zhang, Xiaolin Zhu\*, Shanhe Zhang, Ming Cheng, Mingxuan Yu, Guowei Wang, Chunyi Li\*

*State Key Laboratory of Heavy Oil Processing, China University of Petroleum, Qingdao 266580, PR China*

\*Corresponding authors: Xiaolin Zhu (E-mail: zhuxiaolin@upc.edu.cn)

&

Chunyi Li (E-mail: chyli@upc.edu.cn)

State Key Laboratory of Heavy Oil Processing

China University of Petroleum

Qingdao 266580, PR China

---

\*Corresponding authors.

*E-mail address:* zhuxiaolin@upc.edu.cn (X. Zhu), chyli@upc.edu.cn (C. Li).

## List of contents:

### *Tables*

**Table S1** The chemical compositions of different zeolite samples

**Table S2** The acid amounts of different zeolite samples determined from NH<sub>3</sub>-TPD profiles

**Table S3** The detailed assignments of the vibrational bands in the *in-situ* DRIFT spectra

**Table S4** Summary of the performance of various catalyst samples for direct conversion of methanol to *p*-xylene in both this work and the literatures

### *Figure*

**Fig. S1** The catalytic performance of the regenerated Zn-Mg-P/AT-ZSM-5 catalyst sample.

**Table S1** The chemical compositions of different zeolite samples

| Samples          | SiO <sub>2</sub> /Al <sub>2</sub> O <sub>3</sub> ratio<br>(mol mol <sup>-1</sup> ) | Zn content (wt%) | Mg content (wt%) | P content (wt%) |
|------------------|------------------------------------------------------------------------------------|------------------|------------------|-----------------|
| ZSM-5            | 37.2                                                                               | -                | -                | -               |
| AT-ZSM-5         | 37.4                                                                               | -                | -                | -               |
| Zn/AT-ZSM-5      | 37.9                                                                               | 0.85             | -                | -               |
| Zn-Mg-P/AT-ZSM-5 | 38.0                                                                               | 0.80             | 1.83             | 4.77            |

**Table S2** The acid amounts of different zeolite samples determined from NH<sub>3</sub>-TPD profiles

| Samples          | Acidic amounts (mmol g <sup>-1</sup> ) |      |            |        |
|------------------|----------------------------------------|------|------------|--------|
|                  | Total                                  | Weak | Mid-strong | Strong |
| ZSM-5            | 1.51                                   | 0.77 | 0.10       | 0.64   |
| AT-ZSM-5         | 1.43                                   | 0.69 | 0.06       | 0.68   |
| Zn/ZSM-5         | 1.24                                   | 0.67 | 0.17       | 0.40   |
| Zn/AT-ZSM-5      | 1.21                                   | 0.60 | 0.13       | 0.48   |
| Zn-Mg-P/ZSM-5    | 0.95                                   | 0.28 | 0.36       | 0.31   |
| Zn-Mg-P/AT-ZSM-5 | 0.97                                   | 0.40 | 0.21       | 0.36   |

**Table S3** The detailed assignments of the vibrational bands in the *in-situ* DRIFT spectra

| Wavenumber (cm <sup>-1</sup> ) | Assignments                          |
|--------------------------------|--------------------------------------|
| 800                            | $\delta$ (C-H)s of xylenes           |
| 1180                           | $\nu$ (C-O )                         |
| 1460                           | $\delta$ (C-H)as of -CH <sub>3</sub> |
| 1590                           | $\nu$ (C=C)n of alkenes              |
| 1669                           | $\nu$ (C=C) of alkenes               |
| 2850                           | $\nu$ (C-CH)s of -CH <sub>2</sub> -  |
| 2863                           | $\nu$ (C-CH)s of -CH <sub>3</sub>    |
| 2920                           | $\nu$ (C-H)as of -CH <sub>2</sub> -  |
| 3030                           | $\nu$ (C-H) of aromatics             |

**Table S4** Summary of the performance of various catalyst samples for direct conversion of methanol to *p*-xylene in both this work and the literatures

| Samples                        | Reaction conditions          | <i>p</i> -Xylene yield (wt%) | <i>para</i> -Selectivity (wt%) | C <sub>2</sub> <sup>-</sup> ~ C <sub>4</sub> <sup>-</sup> yield (wt%) | Lifetime (h) | Ref.      |
|--------------------------------|------------------------------|------------------------------|--------------------------------|-----------------------------------------------------------------------|--------------|-----------|
| Si/PLaHZSM-5                   | 420 °C, 2 h <sup>-1</sup>    | 5.09                         | 99.46                          | 44.94                                                                 | ~13          | S1        |
| Mg-Zn-Si-HZSM-5                | 460 °C, 1 h <sup>-1</sup>    | 21.24                        | 98.90                          | 11.78                                                                 | >12          | S2        |
| H[Zn,Al]ZSM-5/SiO <sub>2</sub> | 450 °C, 2.3 h <sup>-1</sup>  | 18.18                        | 95.63                          | -                                                                     | 21           | S3        |
| Zn/P/Si/ZSM-5                  | 475 °C, 0.79 h <sup>-1</sup> | 21.33                        | 89.60                          | -                                                                     | -            | S4        |
| Zn-Mg-P/ZSM-5                  | 400 °C, 2.4 h <sup>-1</sup>  | 16.67                        | 92.19                          | 49.60                                                                 | 36           | This work |
| Zn-Mg-P/AT-ZSM-5               | 400 °C, 2.4 h <sup>-1</sup>  | 19.20                        | 90.85                          | 45.59                                                                 | 50           | This work |

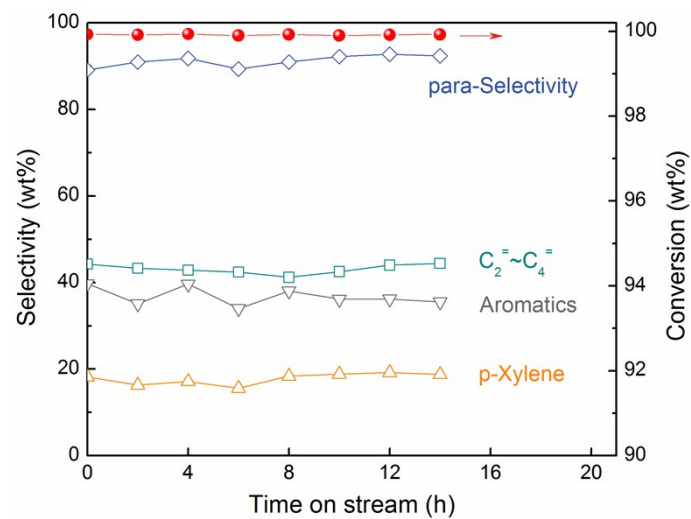

**Fig. S1** The catalytic performance of the regenerated Zn-Mg-P/AT-ZSM-5 catalyst sample.

## References

- S1 Y. Bi, Y. Wang, Y. Wei, Y. He, Z. Yu, Z. Liu and L. Xu, *ChemCatChem*, 2014, **6**, 713-718.
- S2 J. Li, K. Tong, Z. Xi, Y. Yuan, Z. Hu and Z. Zhu, *Catal. Sci. Technol.*, 2016, **6**, 4802-4813.
- S3 D. Pan, X. Song, X. Yang, L. Gao, R. Wei, J. Zhang and G. Xiao, *Appl. Catal., A*, 2018, **557**, 15-24.
- S4 J. Zhang, W. Qian, C. Kong and F. Wei, *ACS Catal.*, 2015, **5**, 2982-2988.
